# Supplementary material
Source: Springer Nature journal article supplement (https://www.springermedizin.de/resource/supplementary/13229_2014_130_MOESM8_ESM.pdf/9676242)
Supplement: MOESM8 [file 9676242]

# Emotion recognition

L  
E  
A  
R  
N  
I  
N  
G  
  
P  
H  
A  
S  
E

## 1- Faces

(Static avatar)

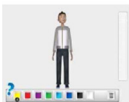

## Game 2

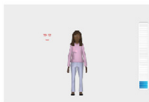

## Game 3

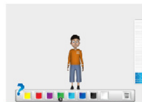

## Games 4a,4b,4c

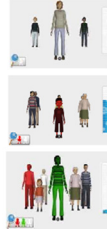

## 2- Faces with Gestures

(Animated avatar)

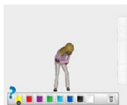

### 2a

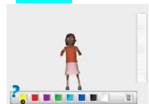

### 2b

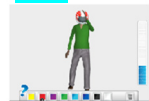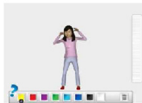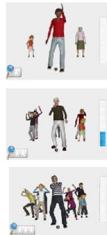

## 3-Faces with Gestures and Verbal

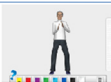

Visual non-verbal code

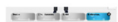

Emotional words

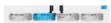

Idiomatic expressions

V  
I  
S  
U  
A  
L  
  
C  
O  
D  
E  
  
+  
  
T  
A  
C  
T  
I  
L  
E
